# Supplementary material for: Propionibacterium acnes: Disease-Causing Agent or Common Contaminant? Detection in Diverse Patient Samples by Next-Generation Sequencing
Source: PubMed Central journal article supplement — J Clin Microbiol. 2016 Mar 25;54(4):980–7. doi: 10.1128/JCM.02723-15 (PMC4809928; doi:10.1128/jcm.02723-15), 2016-03-25
Supplement: JCM.02723-15_zjm999094868so1.pdf [file JCM.02723-15_zjm999094868so1.pdf]

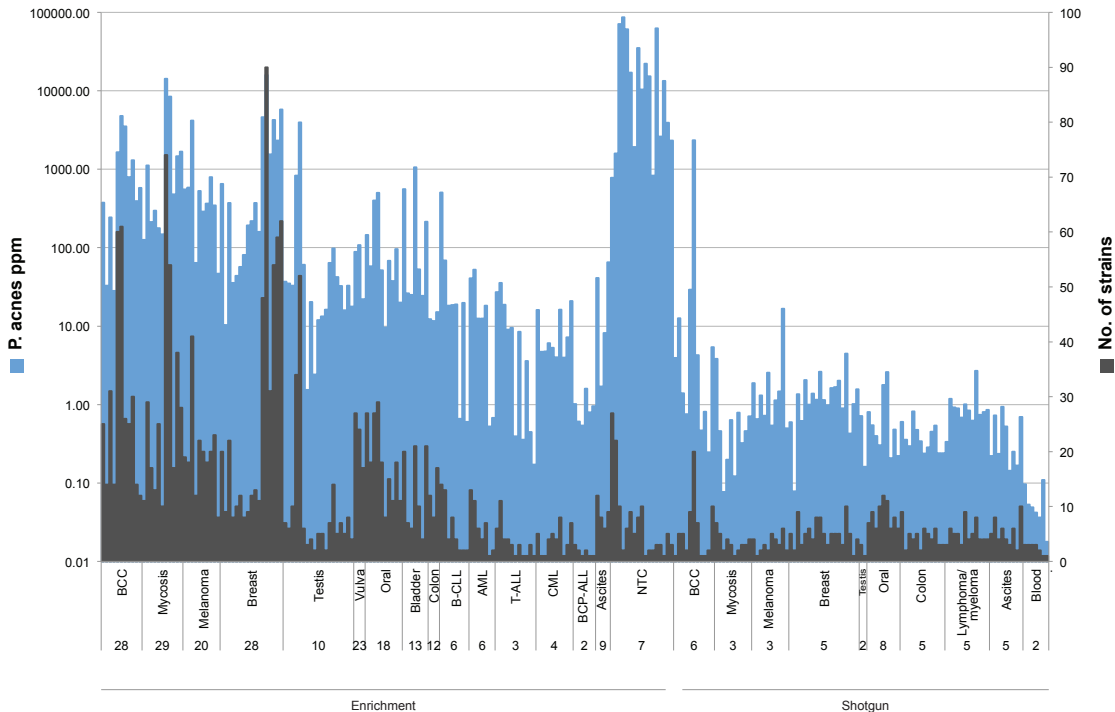

**Fig. S1** Number of *P. acnes* strains detected across samples (grey, right y-axis). *P. acnes* parts per million (ppm) are shown for comparison (blue, left y-axis, logarithmic scale). The bottom horizontal lines indicate enriched or shotgun-sequenced samples, and the bottom vertical ticks delimit the sample categories. The average number of strains detected is indicated below each sample category name. NTC: non-template control.

**Fig. S2** can be accessed at this link:

[http://www.cbs.dtu.dk/~txema/Supplementary/propioni\\_web/index.html](http://www.cbs.dtu.dk/~txema/Supplementary/propioni_web/index.html)

**Fig. S2** Circos plots showing BWA mapping of all human depleted reads to the 12 full *P. acnes* genomes currently present in GenBank. To facilitate visualisation the plots for each accession number is divided into several pages. The outer coverage-circle represents the accumulated coverage for all data sets, and the inner circles represent the genomic coverage in a given data set. The sample number is indicated next to the inner circles, and the corresponding sample information can be seen in the Fig. S2 sample list.
